# Supplementary material for: Positive selection for the male functionality of a co-retroposed gene in the hominoids
Source: PubMed Central journal article supplement (PMC2773790; doi:10.1186/1471-2148-9-252), 2009-10-15
Supplement: 1471-2148-9-252-S3.pdf [file 1471-2148-9-252-S3.pdf]

1160 \* 1180 \* 1200 \* 1220 \* 1240 \* 1260  
gibbon.fast : ATGGGACTCTGAGGTGCTTATGGCTCTGGCATGCCATCAAGAAAAGGGCCATAGAAAGTGTGATTCCCTCAGGAGAGACAACATATAAAAGACAACCTCATCA : 907  
pongo.fast : ATGGGACTCTGAGGTGCTTATGGCTCTGGCATGCCATCAAGAAAAGGGCCATAGAAAGTGTGATTCCCTCAGGAGAGACAACCTCATCA : 1074  
gorilla.fa : ATGGGACTCTGAGGTGCTTATGGCTCTGGCATGCCATCAAGAAAAGGGCCATAGAAAGTGTGATTCCCTCAGGAGAGACAACCTCATCA : 410  
chimp.fast : ATGGGACTCTGAGGTGCTTATGGCTCTGGCATGCCATCAAGAAAAGGGCCATAGAAAGTGTGATTCCCTCAGGAGAGACAACCTCATCA : 1210  
hg18\_dna : ATGGGACTCTGAGGTGCTTATGGCTCTGGCATGCCATCAAGAAAAGGGCCATAGAAAGTGTGATTCCCTCAGGAGAGACAACCTCATCA : 1234  
human\_pare : ATGGGACTCTGAGGTGCTTATGGCTCTGGCATGCCATCAAGAAAAGGGCCATAGAAAGTGTGATTCCCTCAGGAGAGACAACATATAAAAGACAACCTCATCA : 210  
chimp\_pare : ATGGGACTCTGAGGTGCTTATGGCTCTGGCATGCCATCAAGAAAAGGGCCATAGAAAGTGTGATTCCCTCAGGAGAGACAACCTCATCA : 198  
dog\_parent : ATGGGACTCTGAGGTGCTTATGGCTCTGGCATGCCATCAAGAAAAGGGCCATAGAAAGTGTGATTCCCTCAGGAGAGACAACATATAAAAGACAACCTCATCA : 207  
ATGGGACTCTGAGGTGCTTATGGCTCTGGCATGCCATCAAGAAAAGGGCCATAGAAAGTGTGATTCCCTCAGGAGAGACAACCTCATCA

\* 1280 \* 1300 \* 1320 \* 1340 \* 1360  
gibbon.fast : GCCTTGAAGGTCGCATCCAGTTAGGCATTACCCACACTGTGGGGAGCCGTGAGTACCAACCAGAGGTGATGTCCCTCATGCAAGATTTCCACATGGTGGAGAGT : 1012  
pongo.fast : GCCTTGAAGGTCGCATCCAGTTAGGCATTACCCACACTGTGGGGAGCCGTGAGTACCAACCAGAGGTGATGTCCCTCATGCAAGATTTCCACATGGTGGAGAGT : 1179  
gorilla.fa : GCCTTGAAGGTCGCATCCAGTTAGGCATTACCCACACTGTGGGGAGCCGTGAGTACCAACCAGAGGTGATGTCCCTCATGCAAGATTTCCACATGGTGGAGAGT : 515  
chimp.fast : GCCTTGAAGGTCGCATCCAGTTAGGCATTACCCACACTGTGGGGAGCCGTGAGTACCAACCAGAGGTGATGTCCCTCATGCAAGATTTCCACATGGTGGAGAGT : 1315  
hg18\_dna : GCCTTGAAGGTCGCATCCAGTTAGGCATTACCCACACTGTGGGGAGCCGTGAGTACCAACCAGAGGTGATGTCCCTCATGCAAGATTTCCACATGGTGGAGAGT : 1339  
human\_pare : GCCTTGAAGGTCGCATCCAGTTAGGCATTACCCACACTGTGGGGAGCCGTGAGTACCAACCAGAGGTGATGTCCCTCATGCAAGATTTCCACATGGTGGAGAGT : 315  
chimp\_pare : GCCTTGAAGGTCGCATCCAGTTAGGCATTACCCACACTGTGGGGAGCCGTGAGTACCAACCAGAGGTGATGTCCCTCATGCAAGATTTCCACATGGTGGAGAGT : 303  
dog\_parent : GCCTTGAAGGTCGCATCCAGTTAGGCATTACCCACACTGTGGGGAGCCGTGAGTACCAACCAGAGGTGATGTCCCTCATGCAAGATTTCCACATGGTGGAGAGT : 312  
GCCTTGAAGGTCGCATCCAGTTAGGCATTACCCACACTGTGGGGAGCCGTGAGTACCAACCAGAGGTGATGTCCCTCATGCAAGATTTCCACATGGTGGAGAGT

\* 1380 \* 1400 \* 1420 \* 1440 \* 1460 \*  
gibbon.fast : ATCTCTCTTCCAGTGAAGGAGCAACCTGACCCCTGCTCATCACTACAATGCTTTTCTTCAAGACCTATGCAACCTGTGCCTTCGGCTACTTTCGGAGCTA : 1117  
pongo.fast : ATCTCTCTTCCAGTGAAGGAGCAACCTGACCCCTGCTCATCACTACAATGCTTTTCTTCAAGACCTATGCAACCTGTGCCTTCGGCTACTTTCGGAGCTA : 1284  
gorilla.fa : ATCTCTCTTCCAGTGAAGGAGCAACCTGACCCCTGCTCATCACTACAATGCTTTTCTTCAAGACCTATGCAACCTGTGCCTTCGGCTACTTTCGGAGCTA : 620  
chimp.fast : ATCTCTCTTCCAGTGAAGGAGCAACCTGACCCCTGCTCATCACTACAATGCTTTTCTTCAAGACCTATGCAACCTGTGCCTTCGGCTACTTTCGGAGCTA : 1420  
hg18\_dna : ATCTCTCTTCCAGTGAAGGAGCAACCTGACCCCTGCTCATCACTACAATGCTTTTCTTCAAGACCTATGCAACCTGTGCCTTCGGCTACTTTCGGAGCTA : 1444  
human\_pare : ATCTCTCTTCCAGTGAAGGAGCAACCTGACCCCTGCTCATCACTACAATGCTTTTCTTCAAGACCTATGCAACCTGTGCCTTCGGCTACTTTCGGAGCTA : 420  
chimp\_pare : ATCTCTCTTCCAGTGAAGGAGCAACCTGACCCCTGCTCATCACTACAATGCTTTTCTTCAAGACCTATGCAACCTGTGCCTTCGGCTACTTTCGGAGCTA : 408  
dog\_parent : ATCTCTCTTCCAGTGAAGGAGCAACCTGACCCCTGCTCATCACTACAATGCTTTTCTTCAAGACCTATGCAACCTGTGCCTTCGGCTACTTTCGGAGCTA : 417  
ATCTCTCTTCCAGTGAAGGAGCAACCTGACCCCTGCTCATCACTACAATGCTTTTCTTCAAGACCTATGCAACCTGTGCCTTCGGCTACTTTCGGAGCTA

\* 1480 \* 1500 \* 1520 \* 1540 \* 1560 \*  
gibbon.fast : TTTGGTATCCGGCCGATGCTACTATATTCCTCTGCACTGAGCCGCTGATGAACTCTGTAGCTCTGGAGCTATGTTCCCTTTCTATGTTCCAGGGAC : 1222  
pongo.fast : TTTGGTATCCGGCCGATGCTACTATATTCCTCTGCACTGAGCCGCTGATGAACTCTGTAGCTCTGGAGCTATGTTCCCTTTCTATGTTCCAGGGAC : 1389  
gorilla.fa : TTTGGTATCCGGCCGATGCTACTATATTCCTCTGCACTGAGCCGCTGATGAACTCTGTAGCTCTGGAGCTATGTTCCCTTTCTATGTTCCAGGGAC : 725  
chimp.fast : TTTGGTATCCGGCCGATGCTACTATATTCCTCTGCACTGAGCCGCTGATGAACTCTGTAGCTCTGGAGCTATGTTCCCTTTCTATGTTCCAGGGAC : 1525  
hg18\_dna : TTTGGTATCCGGCCGATGCTACTATATTCCTCTGCACTGAGCCGCTGATGAACTCTGTAGCTCTGGAGCTATGTTCCCTTTCTATGTTCCAGGGAC : 1549  
human\_pare : TTTGGTATCCGGCCGATGCTACTATATTCCTCTGCACTGAGCCGCTGATGAACTCTGTAGCTCTGGAGCTATGTTCCCTTTCTATGTTCCAGGGAC : 525  
chimp\_pare : TTTGGTATCCGGCCGATGCTACTATATTCCTCTGCACTGAGCCGCTGATGAACTCTGTAGCTCTGGAGCTATGTTCCCTTTCTATGTTCCAGGGAC : 513  
dog\_parent : TTTGGTATCCGGCCGATGCTACTATATTCCTCTGCACTGAGCCGCTGATGAACTCTGTAGCTCTGGAGCTATGTTCCCTTTCTATGTTCCAGGGAC : 522  
TTTGGTATCCGGCCGATGCTACTATATTCCTCTGCACTGAGCCGCTGATGAACTCTGTAGCTCTGGAGCTATGTTCCCTTTCTATGTTCCAGGGAC

\* 1580 \* 1600 \* 1620 \* 1640 \* 1660 \* 1680 \*  
gibbon.fast : GATGAGTTCATATTAAGACGTCACATAAAGAGCGGAGTTTCTCGAAGACTCCTCCAGGATACCTACAAAGCTCAACCAAGACCTCGGACTTTTCG : 1327  
pongo.fast : GATGAGTTCATATTAAGACGTCACATAAAGAGCGGAGTTTCTCGAAGACTCCTCCAGGATACCTACAAAGCTCAACCAAGACCTCGGACTTTTCG : 1494  
gorilla.fa : GATGAGTTCATATTAAGACGTCACATAAAGAGCGGAGTTTCTCGAAGACTCCTCCAGGATACCTACAAAGCTCAACCAAGACCTCGGACTTTTCG : 830  
chimp.fast : GATGAGTTCATATTAAGACGTCACATAAAGAGCGGAGTTTCTCGAAGACTCCTCCAGGATACCTACAAAGCTCAACCAAGACCTCGGACTTTTCG : 1630  
hg18\_dna : GATGAGTTCATATTAAGACGTCACATAAAGAGCGGAGTTTCTCGAAGACTCCTCCAGGATACCTACAAAGCTCAACCAAGACCTCGGACTTTTCG : 1654  
human\_pare : GATGAGTTCATATTAAGACGTCACATAAAGAGCGGAGTTTCTCGAAGACTCCTCCAGGATACCTACAAAGCTCAACCAAGACCTCGGACTTTTCG : 630  
chimp\_pare : GATGAGTTCATATTAAGACGTCACATAAAGAGCGGAGTTTCTCGAAGACTCCTCCAGGATACCTACAAAGCTCAACCAAGACCTCGGACTTTTCG : 618  
dog\_parent : GATGAGTTCATATTAAGACGTCACATAAAGAGCGGAGTTTCTCGAAGACTCCTCCAGGATACCTACAAAGCTCAACCAAGACCTCGGACTTTTCG : 627  
GATGAGTTCATATTAAGACGTCACATAAAGAGCGGAGTTTCTCGAAGACTCCTCCAGGATACCTACAAAGCTCAACCAAGACCTCGGACTTTTCG

\* 1700 \* 1720 \* 1740 \* 1760 \* 1780 \*  
gibbon.fast : CCTAAAATTCTATGGACTGTAATGCTGTCAGGAGCTGGAAGAACTTCGGATGTGGTGTGATGAACAATCTTTACCAAGATCGGTAATAATGCAATCAAATAT : 1432  
pongo.fast : CCTAAAATTCTATGGACTGTAATGCTGTCAGGAGCTGGAAGAACTTCGGATGTGGTGTGATGAACAATCTTTACCAAGATCGGTAATAATGCAATCAAATAT : 1599  
gorilla.fa : CCTAAAATTCTATGGACTGTAATGCTGTCAGGAGCTGGAAGAACTTCGGATGTGGTGTGATGAACAATCTTTACCAAGATCGGTAATAATGCAATCAAATAT : 935  
chimp.fast : CCTAAAATTCTATGGACTGTAATGCTGTCAGGAGCTGGAAGAACTTCGGATGTGGTGTGATGAACAATCTTTACCAAGATCGGTAATAATGCAATCAAATAT : 1735  
hg18\_dna : CCTAAAATTCTATGGACTGTAATGCTGTCAGGAGCTGGAAGAACTTCGGATGTGGTGTGATGAACAATCTTTACCAAGATCGGTAATAATGCAATCAAATAT : 1759  
human\_pare : CCTAAAATTCTATGGACTGTAATGCTGTCAGGAGCTGGAAGAACTTCGGATGTGGTGTGATGAACAATCTTTACCAAGATCGGTAATAATGCAATCAAATAT : 735  
chimp\_pare : CCTAAAATTCTATGGACTGTAATGCTGTCAGGAGCTGGAAGAACTTCGGATGTGGTGTGATGAACAATCTTTACCAAGATCGGTAATAATGCAATCAAATAT : 723  
dog\_parent : CCTAAAATTCTATGGACTGTAATGCTGTCAGGAGCTGGAAGAACTTCGGATGTGGTGTGATGAACAATCTTTACCAAGATCGGTAATAATGCAATCAAATAT : 732  
CCTAAAATTCTATGGACTGTAATGCTGTCAGGAGCTGGAAGAACTTCGGATGTGGTGTGATGAACAATCTTTACCAAGATCGGTAATAATGCAATCAAATAT

\* 1800 \* 1820 \* 1840 \* 1860 \* 1880 \*  
gibbon.fast : GACCTCAAGGCTCAACCTACAAAGCGGGGCTTCCAGAAAGAGCGGAGAGGACCCCTCCACATTTAAGACCTAGACTTCTTACAGACATCCCTGANGGT : 1537  
pongo.fast : GACCTCAAGGCTCAACCTACAAAGCGGGGCTTCCAGAAAGAGCGGAGAGGACCCCTCCACATTTAAGACCTAGACTTCTTACAGACATCCCTGANGGT : 1704  
gorilla.fa : GACCTCAAGGCTCAACCTACAAAGCGGGGCTTCCAGAAAGAGCGGAGAGGACCCCTCCACATTTAAGACCTAGACTTCTTACAGACATCCCTGANGGT : 1040  
chimp.fast : GACCTCAAGGCTCAACCTACAAAGCGGGGCTTCCAGAAAGAGCGGAGAGGACCCCTCCACATTTAAGACCTAGACTTCTTACAGACATCCCTGANGGT : 1840  
hg18\_dna : GACCTCAAGGCTCAACCTACAAAGCGGGGCTTCCAGAAAGAGCGGAGAGGACCCCTCCACATTTAAGACCTAGACTTCTTACAGACATCCCTGANGGT : 1864  
human\_pare : GACCTCAAGGCTCAACCTACAAAGCGGGGCTTCCAGAAAGAGCGGAGAGGACCCCTCCACATTTAAGACCTAGACTTCTTACAGACATCCCTGANGGT : 840  
chimp\_pare : GACCTCAAGGCTCAACCTACAAAGCGGGGCTTCCAGAAAGAGCGGAGAGGACCCCTCCACATTTAAGACCTAGACTTCTTACAGACATCCCTGANGGT : 828  
dog\_parent : GACCTCAAGGCTCAACCTACAAAGCGGGGCTTCCAGAAAGAGCGGAGAGGACCCCTCCACATTTAAGACCTAGACTTCTTACAGACATCCCTGANGGT : 837  
GACCTCAAGGCTCAACCTACAAAGCGGGGCTTCCAGAAAGAGCGGAGAGGACCCCTCCACATTTAAGACCTAGACTTCTTACAGACATCCCTGANGGT

\* 1900 \* 1920 \* 1940 \* 1960 \* 1980 \*  
gibbon.fast : CTTTTTTTGGATGCTGACATCCAAAGGCTCTCTGTAAGACCTCCAGCGTACTCTTTGGTCTGCGAGGCTCAAGATAATGGATTATAGCCCTTTGATGTC : 1642  
pongo.fast : CTTTTTTTGGATGCTGACATCCAAAGGCTCTCTGTAAGACCTCCAGCGTACTCTTTGGTCTGCGAGGCTCAAGATAATGGATTATAGCCCTTTGATGTC : 1809  
gorilla.fa : CTTTTTTTGGATGCTGACATCCAAAGGCTCTCTGTAAGACCTCCAGCGTACTCTTTGGTCTGCGAGGCTCAAGATAATGGATTATAGCCCTTTGATGTC : 1145  
chimp.fast : CTTTTTTTGGATGCTGACATCCAAAGGCTCTCTGTAAGACCTCCAGCGTACTCTTTGGTCTGCGAGGCTCAAGATAATGGATTATAGCCCTTTGATGTC : 1945  
hg18\_dna : CTTTTTTTGGATGCTGACATCCAAAGGCTCTCTGTAAGACCTCCAGCGTACTCTTTGGTCTGCGAGGCTCAAGATAATGGATTATAGCCCTTTGATGTC : 1969  
human\_pare : CTTTTTTTGGATGCTGACATCCAAAGGCTCTCTGTAAGACCTCCAGCGTACTCTTTGGTCTGCGAGGCTCAAGATAATGGATTATAGCCCTTTGATGTC : 945  
chimp\_pare : CTTTTTTTGGATGCTGACATCCAAAGGCTCTCTGTAAGACCTCCAGCGTACTCTTTGGTCTGCGAGGCTCAAGATAATGGATTATAGCCCTTTGATGTC : 933  
dog\_parent : CTTTTTTTGGATGCTGACATCCAAAGGCTCTCTGTAAGACCTCCAGCGTACTCTTTGGTCTGCGAGGCTCAAGATAATGGATTATAGCCCTTTGATGTC : 942  
CTTTTTTTGGATGCTGACATCCAAAGGCTCTCTGTAAGACCTCCAGCGTACTCTTTGGTCTGCGAGGCTCAAGATAATGGATTATAGCCCTTTGATGTC

\* 2000 \* 2020 \* 2040 \* 2060 \* 2080 \* 2100 \*  
gibbon.fast : ATCCATAATATAGATCATGCACAAAGAGGACCTTAAGCAGCAAAACACATACTCAGTTGATCTCGAAGACAGCCCCAAAAGGCTCTGTATTTCCACAGGCC : 1747  
pongo.fast : ATCCATAATATAGATCATGCACAAAGAGGACCTTAAGCAGCAGAAACACATACTCAGTTGATCTCGAAGACAGCCCCAAAAGGCTCTGTATTTCCACAGGCC : 1914  
gorilla.fa : ATCCATAATATAGATCATGCACAAAGAGGACCTTAAGCAGCAGAAACACATACTCAGTTGATCTCGAAGACAGCCCCAAAAGGCTCTGTATTTCCACAGGCC : 1250  
chimp.fast : ATCCATAATATAGATCATGCACAAAGAGGACCTTAAGCAGCAGAAACACATACTCAGTTGATCTCGAAGACAGCCCCAAAAGGCTCTGTATTTCCACAGGCC : 2050  
hg18\_dna : ATCCATAATATAGATCATGCACAAAGAGGACCTTAAGCAGCAGAAACACATACTCAGTTGATCTCGAAGACAGCCCCAAAAGGCTCTGTATTTCCACAGGCC : 2074  
human\_pare : ATCCATAATATAGATCATGCACAAAGAGGACCTTAAGCAGCAGAAACACATACTCAGTTGATCTCGAAGACAGCCCCAAAAGGCTCTGTATTTCCACAGGCC : 1050  
chimp\_pare : ATCCATAATATAGATCATGCACAAAGAGGACCTTAAGCAGCAGAAACACATACTCAGTTGATCTCGAAGACAGCCCCAAAAGGCTCTGTATTTCCACAGGCC : 1038  
dog\_parent : ATCCATAATATAGATCATGCACAAAGAGGACCTTAAGCAGCAGAAACACATACTCAGTTGATCTCGAAGACAGCCCCAAAAGGCTCTGTATTTCCACAGGCC : 1047  
ATCCATAATATAGATCATGCACAAAGAGGACCTTAAGCAGCAGAAACACATACTCAGTTGATCTCGAAGACAGCCCCAAAAGGCTCTGTATTTCCACAGGCC

gibbon.fas : ATGGAATCCATCCAGGGAAGGCTCGACGGGTGGCAATGCGGAGAGCGATGACCATATGGGTGGCATCCCTGCCGAAATAGTAAAGGGGAAGGCTCTGCTT : 1852  
pongo.fast : ATGGAATCCATCCAGGGAAGGCTCGAAGGGTGGCAATGCGGAGAGCGATGACCATATGGGTGGCATCCCTGCCGAAATAGTAAAGGGGAAGGCTCTGCTT : 2019  
gorilla.fa : ATGGAATCCATCCAGGGAAGGCTCGACGGGTGGCAATGCGGAGAGCGATGACCATATGGGTGGCATCCCTGCCGAAATAGTAAAGGGGAAGGCTCTGCTT : 1355  
chimp.fast : ATGGAATCCATCCAGGGAAGGCTCGACGGGTGGCAATGCGGAGAGCGATGACCATATGGGTGGCATCCCTGCCGAAATAGTAAAGGGGAAGGCTCTGCTT : 2155  
hg18\_dna : ATGGAATCCATCCAGGGAAGGCTCGACGGGTGGCAATGCGGAGAGCGATGACCATATGGGTGGCATCCCTGCCGAAATAGTAAAGGGGAAGGCTCTGCTT : 2179  
human\_pare : ATGGAATCCATCCAGGGAAGGCTCGACGGGTGGCAATGCGGAGAGCGATGACCATATGGGTGGCATCCCTGCCGAAATAGTAAAGGGGAAGGCTCTGCTT : 1155  
chimp\_pare : ATGGAATCCATCCAGGGAAGGCTCGACGGGTGGCAATGCGGAGAGCGATGACCATATGGGTGGCATCCCTGCCGAAATAGTAAAGGGGAAGGCTCTGCTT : 1143  
dog\_parent : ATGGAATCCATCCAGGGAAGGCTCGACGGGTGGCAATGCGGAGAGCGATGACCATATGGGTGGCATCCCTGCCGAAATAGTAAAGGGGAAGGCTCTGCTT : 1152

gibbon.fas : TATATTTGGCATCATTGACATTTCAAGTCTTACAGTTTGTAAAGTGGAGCATCTTGGAAAGCCCTGGTACATGAGGAGACACAGTCTCAGTGCATCGC : 1957  
pongo.fast : TATATTTGGCATCATTGACATTTCAAGTCTTACAGTTTGTAAAGTGGAGCATCTTGGAAAGCCCTGGTACATGAGGAGACACAGTCTCAGTGCATCGC : 2124  
gorilla.fa : TATATTTGGCATCATTGACATTTCAAGTCTTACAGTTTGTAAAGTGGAGCATCTTGGAAAGCCCTGGTACATGAGGAGACACAGTCTCAGTGCATCGC : 1460  
chimp.fast : TATATTTGGCATCATTGACATTTCAAGTCTTACAGTTTGTAAAGTGGAGCATCTTGGAAAGCCCTGGTACATGAGGAGACACAGTCTCAGTGCATCGC : 2260  
hg18\_dna : TATATTTGGCATCATTGACATTTCAAGTCTTACAGTTTGTAAAGTGGAGCATCTTGGAAAGCCCTGGTACATGAGGAGACACAGTCTCAGTGCATCGC : 2284  
human\_pare : TATATTTGGCATCATTGACATTTCAAGTCTTACAGTTTGTAAAGTGGAGCATCTTGGAAAGCCCTGGTACATGAGGAGACACAGTCTCAGTGCATCGC : 1260  
chimp\_pare : TATATTTGGCATCATTGACATTTCAAGTCTTACAGTTTGTAAAGTGGAGCATCTTGGAAAGCCCTGGTACATGAGGAGACACAGTCTCAGTGCATCGC : 1248  
dog\_parent : TATATTTGGCATCATTGACATTTCAAGTCTTACAGTTTGTAAAGTGGAGCATCTTGGAAAGCCCTGGTACATGAGGAGACACAGTCTCAGTGCATCGC : 1257

gibbon.fas : CCAGCCTCTTCCGCTAAAGGTTCCAGCGCTTCATGTCAACACAGTATTAAGAGATTCCTTGAAGCCCTCTCCCTCAAAAAGTTCGCTGGTGCATCT : 2062  
pongo.fast : CCAGCCTCTTCCGCTAAAGGTTCCAGCGCTTCATGTCAACACAGTATTAAGAGATTCCTTGAAGCCCTCTCCCTCAAAAAGTTCGCTGGTGCATCT : 2229  
gorilla.fa : CCAGCCTCTTCCGCTAAAGGTTCCAGCGCTTCATGTCAACACAGTATTAAGAGATTCCTTGAAGCCCTCTCCCTCAAAAAGTTCGCTGGTGCATCT : 1565  
chimp.fast : CCAGCCTCTTCCGCTAAAGGTTCCAGCGCTTCATGTCAACACAGTATTAAGAGATTCCTTGAAGCCCTCTCCCTCAAAAAGTTCGCTGGTGCATCT : 2365  
hg18\_dna : CCAGCCTCTTCCGCTAAAGGTTCCAGCGCTTCATGTCAACACAGTATTAAGAGATTCCTTGAAGCCCTCTCCCTCAAAAAGTTCGCTGGTGCATCT : 2389  
human\_pare : CCAGCCTCTTCCGCTAAAGGTTCCAGCGCTTCATGTCAACACAGTATTAAGAGATTCCTTGAAGCCCTCTCCCTCAAAAAGTTCGCTGGTGCATCT : 1365  
chimp\_pare : CCAGCCTCTTCCGCTAAAGGTTCCAGCGCTTCATGTCAACACAGTATTAAGAGATTCCTTGAAGCCCTCTCCCTCAAAAAGTTCGCTGGTGCATCT : 1353  
dog\_parent : CCAGCCTCTTCCGCTAAAGGTTCCAGCGCTTCATGTCAACACAGTATTAAGAGATTCCTTGAAGCCCTCTCCCTCAAAAAGTTCGCTGGTGCATCT : 1362

gibbon.fas : TTCTCTCAGCAGGCTCCAGTGGCAACTCCTGCATTTTACCAGCCATGGTCTCTGGGGAACACAAGGCCAAGTGAACAACAAGGGGAAGTGGAGCCA : 2167  
pongo.fast : TTCTCTCAGCAGGCTCCAGTGGCAACTCCTGCATTTTACCAGCCATGGTCTCTGGGGAACACAAGGCCAAGTGAACAACAAGGGGAAGTGGAGCCA : 2334  
gorilla.fa : TTCTCTCAGCAGGCTCCAGTGGCAACTCCTGCATTTTACCAGCCATGGTCTCTGGGGAACACAAGGCCAAGTGAACAACAAGGGGAAGTGGAGCCA : 1670  
chimp.fast : TTCTCTCAGCAGGCTCCAGTGGCAACTCCTGCATTTTACCAGCCATGGTCTCTGGGGAACACAAGGCCAAGTGAACAACAAGGGGAAGTGGAGCCA : 2470  
hg18\_dna : TTCTCTCAGCAGGCTCCAGTGGCAACTCCTGCATTTTACCAGCCATGGTCTCTGGGGAACACAAGGCCAAGTGAACAACAAGGGGAAGTGGAGCCA : 2494  
human\_pare : TTCTCTCAGCAGGCTCCAGTGGCAACTCCTGCATTTTACCAGCCATGGTCTCTGGGGAACACAAGGCCAAGTGAACAACAAGGGGAAGTGGAGCCA : 1470  
chimp\_pare : TTCTCTCAGCAGGCTCCAGTGGCAACTCCTGCATTTTACCAGCCATGGTCTCTGGGGAACACAAGGCCAAGTGAACAACAAGGGGAAGTGGAGCCA : 1458  
dog\_parent : TTCTCTCAGCAGGCTCCAGTGGCAACTCCTGCATTTTACCAGCCATGGTCTCTGGGGAACACAAGGCCAAGTGAACAACAAGGGGAAGTGGAGCCA : 1467

gibbon.fas : GGGCTTCACTTGGTCTGATGTTTACCTCAGACTCCACCTTTGGAGAAATCAGTGGGGTCTGGCTATTCCTGACCCAGTTTCTCACCCTAGTTTGG : 2272  
pongo.fast : GGGCTTCACTTGGTCTGATGTTTACCTCAGACTCCACCTTTGGAGAAATCAGTGGGGTCTGGCTATTCCTGACCCAGTTTCTCACCCTAGTTTGG : 2439  
gorilla.fa : GGGCTTCACTTGGTCTGATGTTTACCTCAGACTCCACCTTTGGAGAAATCAGTGGGGTCTGGCTATTCCTGACCCAGTTTCTCACCCTAGTTTGG : 1758  
chimp.fast : GGGCTTCACTTGGTCTGATGTTTACCTCAGACTCCACCTTTGGAGAAATCAGTGGGGTCTGGCTATTCCTGACCCAGTTTCTCACCCTAGTTTGG : 2575  
hg18\_dna : GGGCTTCACTTGGTCTGATGTTTACCTCAGACTCCACCTTTGGAGAAATCAGTGGGGTCTGGCTATTCCTGACCCAGTTTCTCACCCTAGTTTGG : 2599  
human\_pare : GGGCTTCACTTGGTCTGATGTTTACCTCAGACTCCACCTTTGGAGAAATCAGTGGGGTCTGGCTATTCCTGACCCAGTTTCTCACCCTAGTTTGG : 1575  
chimp\_pare : GGGCTTCACTTGGTCTGATGTTTACCTCAGACTCCACCTTTGGAGAAATCAGTGGGGTCTGGCTATTCCTGACCCAGTTTCTCACCCTAGTTTGG : 1563  
dog\_parent : GGGCTTCACTTGGTCTGATGTTTACCTCAGACTCCACCTTTGGAGAAATCAGTGGGGTCTGGCTATTCCTGACCCAGTTTCTCACCCTAGTTTGG : 1572

gibbon.fas : GAGACTTTGCAAAATGCTAACTACA-----ETGTC : 2302  
pongo.fast : GAGACTTTGCAAAATGCTAACTACA-----ETGTC : 2469  
gorilla.fa : ----- : -  
chimp.fast : GAGACTTTGCAAAATGCTAACTACA-----ETGTC : 2605  
hg18\_dna : GAGACTTTGCAAAATGCTAACTACA-----ETGTC : 2629  
human\_pare : GAGACTTTGCAAAATGCTAACTACA-----GTACAACCTTGGAAAAGCTGAAGTTCGACAGTTCAGAGTTTCAACCCATTAATGGTGTGGAAAGCAGTATGGTGTGTC : 1680  
chimp\_pare : GAGACTTTGCAAAATGCTAACTACA-----ETGTC : 1593  
dog\_parent : GAGACTTTGCAAAATGCTAACTACA-----ETGTC : 1602

gibbon.fas : GACAACAGTGAATATGCGGAATGGAGACTTCTTACCACCGGGTGCAGGCCAGCAGGATGCTGTCAACAGTTTGTTCATTCAAAGCCCGCAGCAACCC : 2407  
pongo.fast : GACAACAGTGAATATGCGGAATGGAGACTTCTTACCACCGGGTGCAGGCCAGCAGGATGCTGTCAACAGTTTGTTCATTCAAAGCCCGCAGCAACCC : 2574  
gorilla.fa : ----- : -  
chimp.fast : GACAACAGTGAATATGCGGAATGGAGACTTCTTACCACCGGGTGCAGGCCAGCAGGATGCTGTCAACAGTTTGTTCATTCAAAGCCCGCAGCAACCC : 2710  
hg18\_dna : GACAACAGTGAATATGCGGAATGGAGACTTCTTACCACCGGGTGCAGGCCAGCAGGATGCTGTCAACAGTTTGTTCATTCAAAGCCCGCAGCAACCC : 2734  
human\_pare : GACAACAGTGAATATGCGGAATGGAGACTTCTTACCACCGGGTGCAGGCCAGCAGGATGCTGTCAACAGTTTGTTCATTCAAAGCCCGCAGCAACCC : 1785  
chimp\_pare : GACAACAGTGAATATGCGGAATGGAGACTTCTTACCACCGGGTGCAGGCCAGCAGGATGCTGTCAACAGTTTGTTCATTCAAAGCCCGCAGCAACCC : 1698  
dog\_parent : GACAACAGTGAATATGCGGAATGGAGACTTCTTACCACCGGGTGCAGGCCAGCAGGATGCTGTCAACAGTTTGTTCATTCAAAGCCCGCAGCAACCC : 1707

gibbon.fas : GAGAACAACGTTGGCCCTTATCACACTGGTAATGACTGTGAAGTCTGTGACCACTACCCAGCACTGGCCGTATCCCTGTCCAAAGCTACATCTGTCCAACCC : 2512  
pongo.fast : GAGAACAACGTTGGCCCTTATCACACTGGTAATGACTGTGAAGTCTGTGACCACTACCCAGCACTGGCCGTATCCCTGTCCAAAGCTACATCTGTCCAACCC : 2679  
gorilla.fa : ----- : -  
chimp.fast : GAGAACAACGTTGGCCCTTATCACACTGGTAATGACTGTGAAGTCTGTGACCACTACCCAGCACTGGCCGTATCCCTGTCCAAAGCTACATCTGTCCAACCC : 2815  
hg18\_dna : GAGAACAACGTTGGCCCTTATCACACTGGTAATGACTGTGAAGTCTGTGACCACTACCCAGCACTGGCCGTATCCCTGTCCAAAGCTACATCTGTCCAACCC : 2839  
human\_pare : GAGAACAACGTTGGCCCTTATCACACTGGTAATGACTGTGAAGTCTGTGACCACTACCCAGCACTGGCCGTATCCCTGTCCAAAGCTACATCTGTCCAACCC : 1890  
chimp\_pare : GAGAACAACGTTGGCCCTTATCACACTGGTAATGACTGTGAAGTCTGTGACCACTACCCAGCACTGGCCGTATCCCTGTCCAAAGCTACATCTGTCCAACCC : 1803  
dog\_parent : GAGAACAACGTTGGCCCTTATCACACTGGTAATGACTGTGAAGTCTGTGACCACTACCCAGCACTGGCCGTATCCCTGTCCAAAGCTACATCTGTCCAACCC : 1812

gibbon.fas : AAGGGCAAGTCAACCTTCTGCGGGCATCCAGTGGCCCATCTGGCTCTGAAGCAGCAGGCAAGTCAACAAGTTCGATCACAAGATCCGATCATTCCTTTGTGGGAG : 2617  
pongo.fast : AAGGGCAAGTCAACCTTCTGCGGGCATCCAGTGGCCCATCTGGCTCTGAAGCAGCAGGCAAGTCAACAAGTTCGATCACAAGATCCGATCATTCCTTTGTGGGAG : 2784  
gorilla.fa : ----- : -  
chimp.fast : AAGGGCAAGTCAACCTTCTGCGGGCATCCAGTGGCCCATCTGGCTCTGAAGCAGCAGGCAAGTCAACAAGTTCGATCACAAGATCCGATCATTCCTTTGTGGGAG : 2920  
hg18\_dna : AAGGGCAAGTCAACCTTCTGCGGGCATCCAGTGGCCCATCTGGCTCTGAAGCAGCAGGCAAGTCAACAAGTTCGATCACAAGATCCGATCATTCCTTTGTGGGAG : 2944  
human\_pare : AAGGGCAAGTCAACCTTCTGCGGGCATCCAGTGGCCCATCTGGCTCTGAAGCAGCAGGCAAGTCAACAAGTTCGATCACAAGATCCGATCATTCCTTTGTGGGAG : 1995  
chimp\_pare : AAGGGCAAGTCAACCTTCTGCGGGCATCCAGTGGCCCATCTGGCTCTGAAGCAGCAGGCAAGTCAACAAGTTCGATCACAAGATCCGATCATTCCTTTGTGGGAG : 1908  
dog\_parent : AAGGGCAAGTCAACCTTCTGCGGGCATCCAGTGGCCCATCTGGCTCTGAAGCAGCAGGCAAGTCAACAAGTTCGATCACAAGATCCGATCATTCCTTTGTGGGAG : 1917

aaggccaagatcaacctctgca gggcatcc ctggtccatctggtctgaagcagcagcaagcaaatcaagaat cgcacatctgcttctgtggaa c
