# Supplementary material for: Positive selection for the male functionality of a co-retroposed gene in the hominoids
Source: PubMed Central journal article supplement (PMC2773790; doi:10.1186/1471-2148-9-252), 2009-10-15
Supplement: 1471-2148-9-252-S4.pdf [file 1471-2148-9-252-S4.pdf]

| Alignment                      | Model  | Codeml parameters and hypothesis                                                                                                                                                                                                                            |
|--------------------------------|--------|-------------------------------------------------------------------------------------------------------------------------------------------------------------------------------------------------------------------------------------------------------------|
| <i>PIP5K1A</i> -derived region | Branch | <pre> (((((((human,chimp),gorilla),pongo#1),gibbon), (human_p,chimp_p)),rhesus_p),dog_p),opossum_p); df=1 fix_omega = 1 omega = 1 whether orangutan branch has an omega different from 1 p=0.020 </pre>                                                     |
| <i>PSMD4</i> -derived region   | Branch | <pre> (((((((human#2,chimp#2)#1,pongo#2)#1,gibbon)#1, (((human_p,chimp_p),pongo_p),gibbon_p)),rhesus_p) ,dog_p),opossum_p) df=1 whether PSMD4-derived region has two sets of omega for the internal branch and external branch, respectively p=0.026 </pre> |
| <i>PSMD4</i> -derived region   | Branch | <pre> (((((((human,chimp),pongo#1),gibbon), (((human_p,chimp_p),pongo_p),gibbon_p)),rhesus_p) ,dog_p),opossum_p) fix_omega = 1 omega = 1 df=1 whether orangutan branch has an omega different from 1 p=0.10 </pre>                                          |
| <i>PSMD4</i> -derived region   | Branch | <pre> (((((((human,chimp)#1,pongo),gibbon), (((human_p,chimp_p),pongo_p),gibbon_p)),rhesus_p) ,dog_p),opossum_p) fix_omega = 1 omega = 1 df=1 whether human/chimp ancestral branch has an omega different from 1 p=0.033 </pre>                             |
| <i>PSMD4</i> -derived region   | Branch | <pre> ((((((human,chimp)#1 , (((human_p,chimp_p),pongo_p),gibbon_p)),rhesus_p) ,dog_p),opossum_p) fix_omega = 1 omega = 1 df=1 whether human/chimp ancestral branch has an omega different from 1 p=0.043 </pre>                                            |

| Alignment                    | Model       | Codeml parameters and hypothesis                                                                                                             |
|------------------------------|-------------|----------------------------------------------------------------------------------------------------------------------------------------------|
| <i>PSMD4</i> -derived region | Branch-site | <pre> ((((((human,chimp)#1,pongo),gibbon), (((human_p,chimp_p),pongo_p),gibbon_p)),rhesus_p) ,dog_p),opossum_p) model = 2 NSsites = 2 </pre> |
