# Supplementary material for: Positive selection for the male functionality of a co-retroposed gene in the hominoids
Source: PubMed Central journal article supplement (PMC2773790; doi:10.1186/1471-2148-9-252), 2009-10-15
Supplement: 1471-2148-9-252-S6.pdf [file 1471-2148-9-252-S6.pdf]

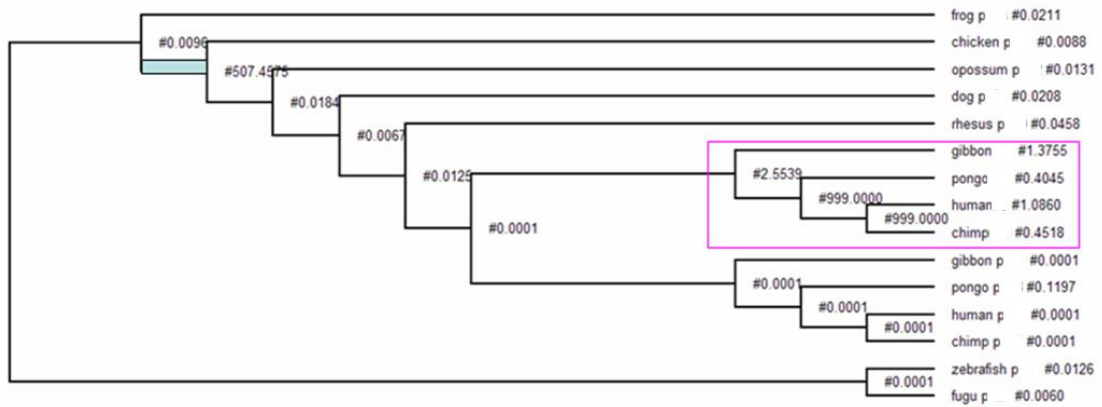

Evolution of PSMD4 across various vertebrate. The pink rectangle marks the PIPSL locus, while the blue bar marks the adaptive evolution of PSMD4 before the split of birds and mammals. The number on all the branches like (#0.0090) shows the  $Ka/Ks$ .
