# Supplementary material for: Positive selection for the male functionality of a co-retroposed gene in the hominoids
Source: PubMed Central journal article supplement (PMC2773790; doi:10.1186/1471-2148-9-252), 2009-10-15
Supplement: 1471-2148-9-252-S8.pdf [file 1471-2148-9-252-S8.pdf]

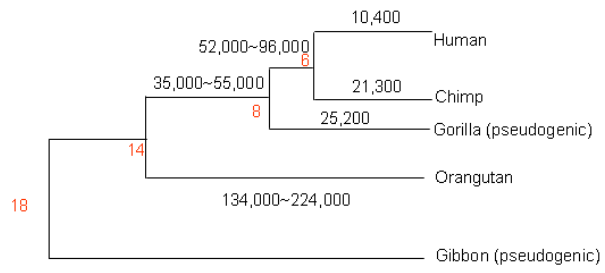

Phylogeny of hominoids. Numbers in red marks the divergence time in million years, while numbers in black show the estimation of  $N_e$ .
